# Supplementary material for: A novel carbon nanotube/polymer composite film for counter electrodes of dye-sensitized solar cells
Source: Royal Society of Chemistry journal article supplement (doi:10.1039/c2py21021e), 2012-12-18
Supplement: c2py21021e.pdf [file c2py21021e.pdf]

## Supporting Information

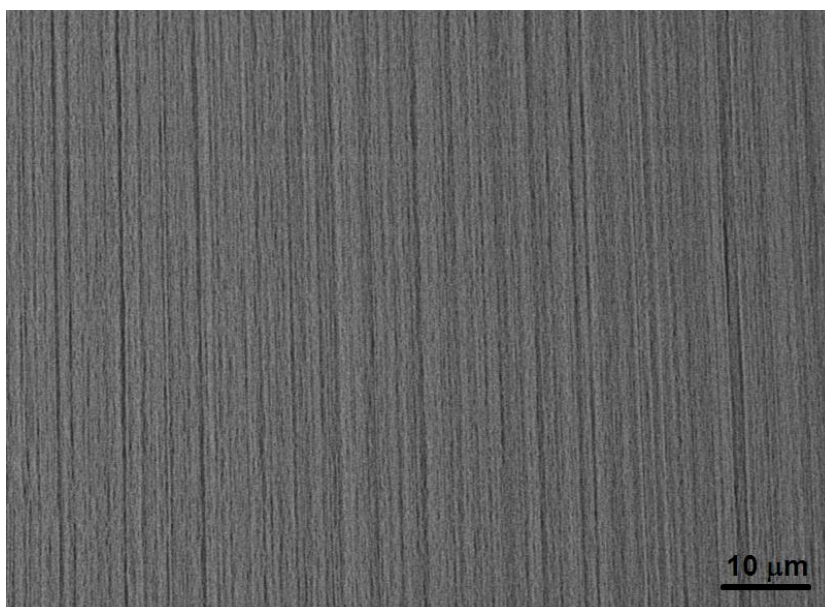

**Figure S1.** SEM image of a CNT array from a side view.

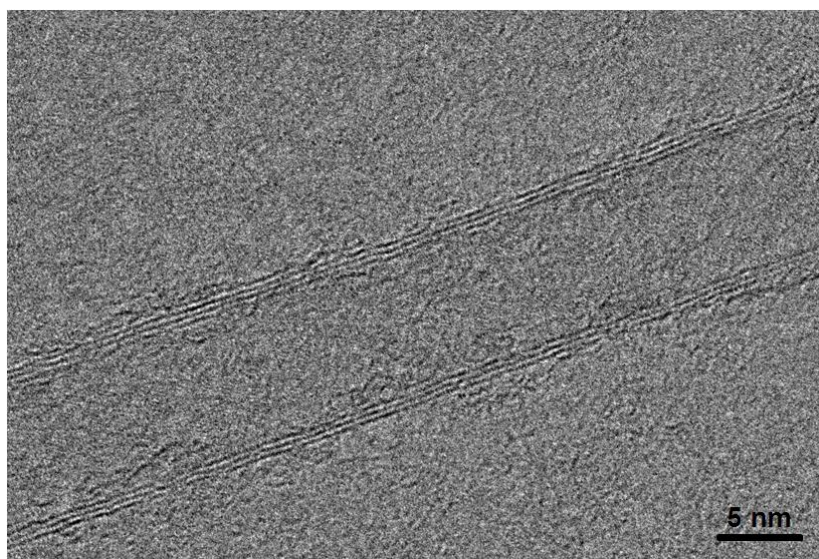

**Figure S2.** High-resolution TEM image of a CNT.

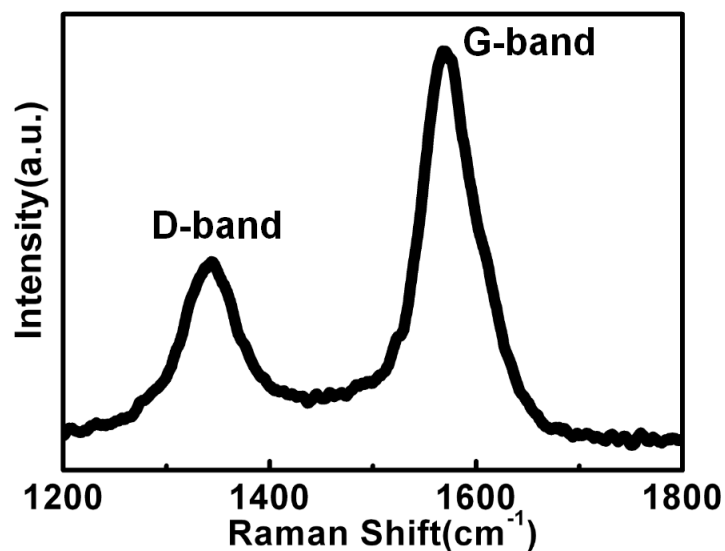

**Figure S3.** Raman spectrum of a CNT array.

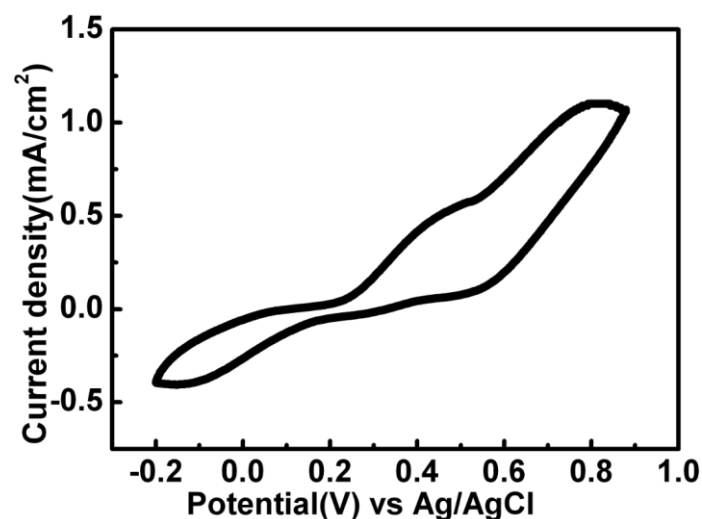

**Figure S4.** Electrocatalytic characterization by the cyclic voltammetry performed in 1 mM I<sub>2</sub>, 10 mM LiI, and 0.1 M LiClO<sub>4</sub> acetonitrile solution with a scan rate of 100 mV s<sup>-1</sup> on a three-electrode setup. Two oxidation/reduction peaks clearly show a catalytic activity derived from CNTs for reduction of I<sub>3</sub><sup>-</sup>. The left and right peaks correspond to the oxidation/reduction of I<sup>-</sup>/I<sub>3</sub><sup>-</sup> and I<sub>2</sub>/I<sub>3</sub><sup>-</sup>, respectively (*Electrochim. Acta* 2008, 53, 2890).

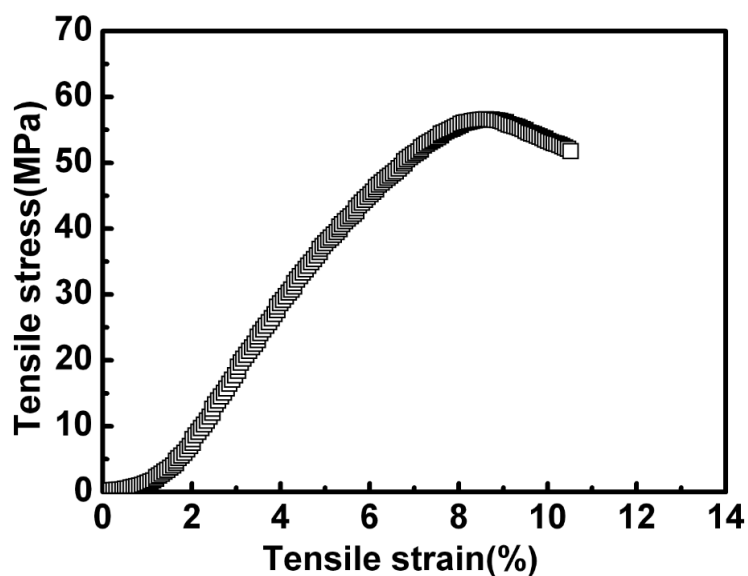

**Figure S5.** A typical tensile stress-stain curve of a perpendicularly aligned and penetrated CNT/resin composite film.

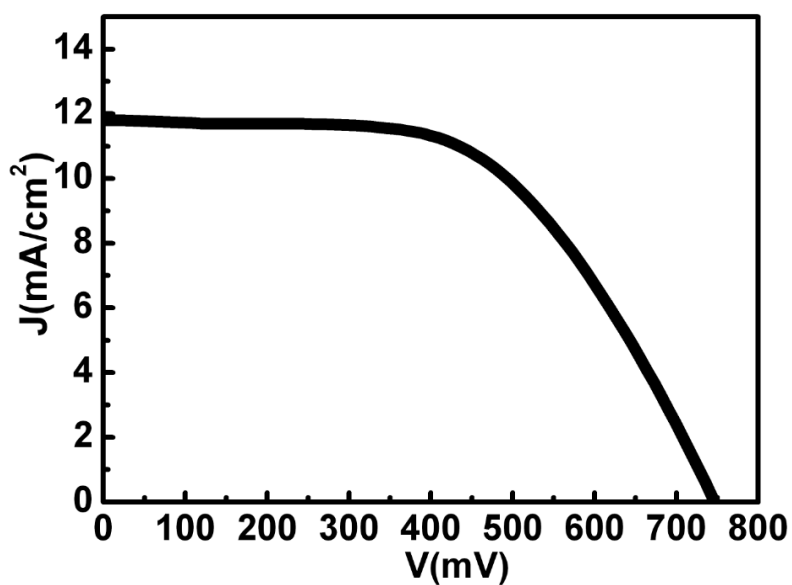

**Figure S6.** J-V curve of a dye-sensitized solar cell by using the platinum as counter electrode.

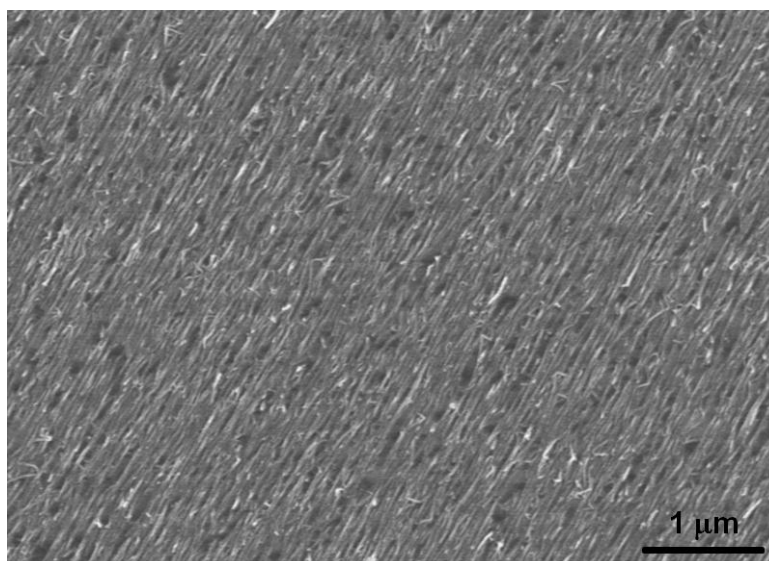

**Figure S7.** SEM images of aligned CNT/resin composite film derived from a pressed CNT array (improved for three times in CNT number density).

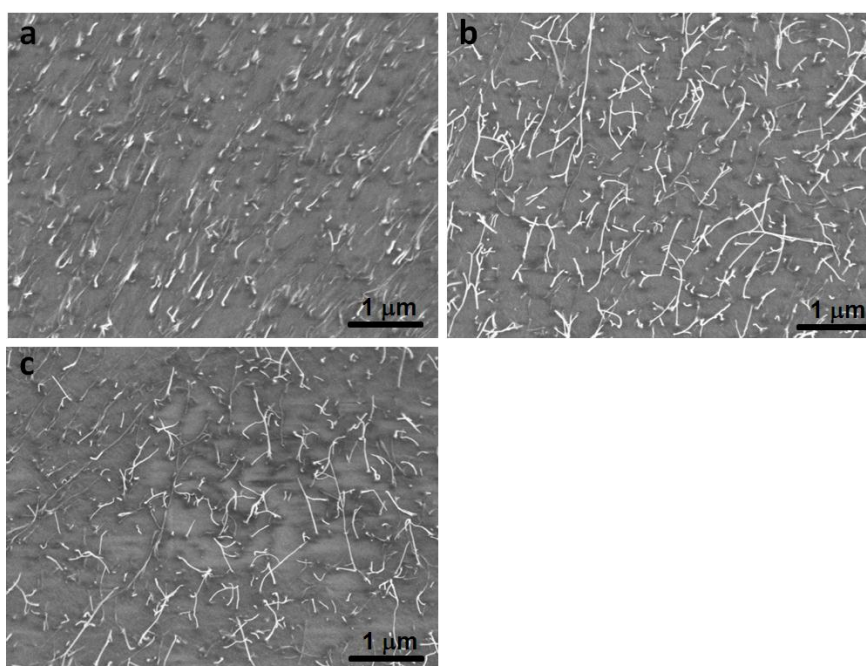

**Figure S8.** SEM images of aligned CNT/resin composite film after incorporating (a) polydiacetylene, (b) polyaniline, and (c) polypyrrole into pure CNT arrays.

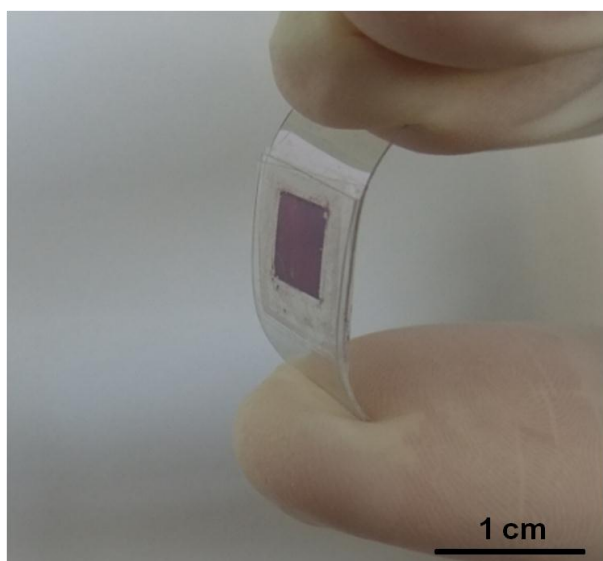

**Figure S9.** Photo of a flexible dye-sensitized solar cell by using the perpendicularly aligned and penetrated CNT/polymer composite film as counter electrode.

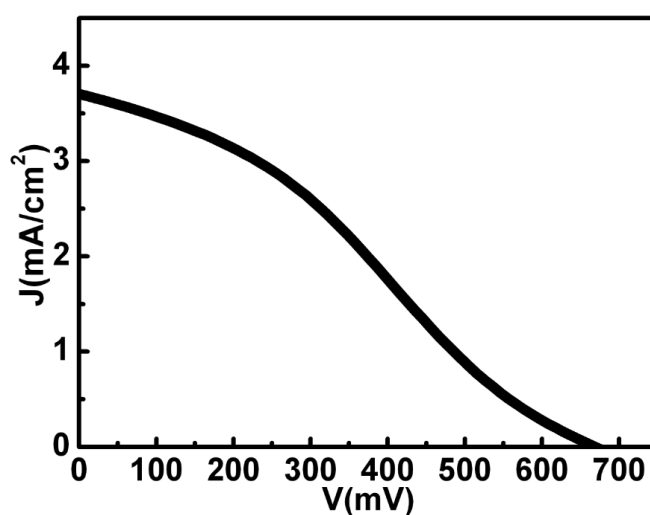

**Figure S10.** A typical J-V curve of a flexible dye-sensitized solar cell by a perpendicularly aligned and penetrated CNT/resin composite film as a counter electrode measured under AM1.5 illumination.

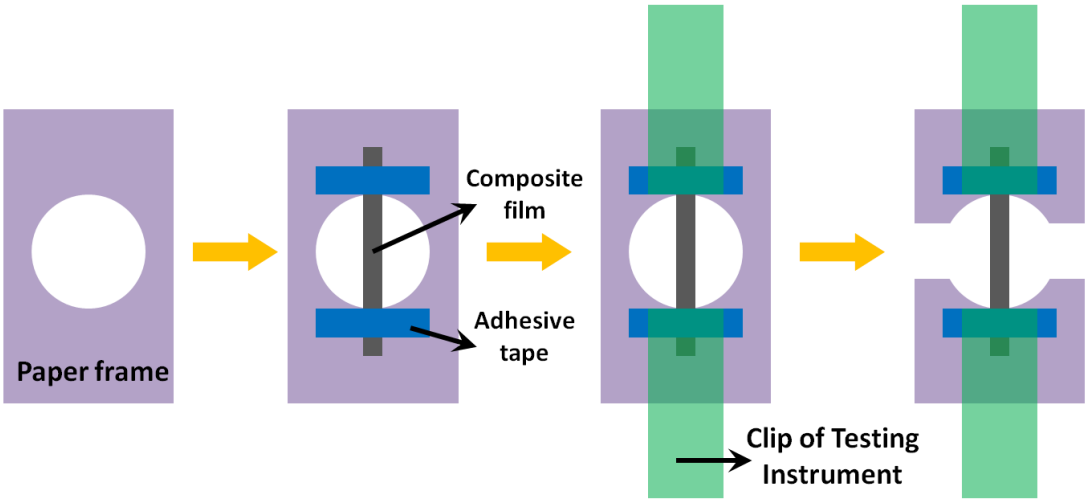

**Figure S11.** Schematic illustration to the mechanical measurement.
